# Supplementary material for: Detection of anti-Trypanosoma cruzi antibodies by chimeric antigens in chronic Chagas disease-individuals from endemic South American countries
Source: PubMed Central journal article supplement (PMC6472793; doi:10.1371/journal.pone.0215623), 2019-04-18
Supplement: pone.0215623.s002.pdf [file pone.0215623.s002.pdf]

| Samples                      | Reactivity Index |          |
|------------------------------|------------------|----------|
|                              | IBMP-8.1         | IBMP-8.4 |
| <i>T. cruzi</i> -negative_1  | 0.15             | 0.14     |
| <i>T. cruzi</i> -negative_2  | 0.47             | 0.43     |
| <i>T. cruzi</i> -negative_3  | 0.70             | 0.58     |
| <i>T. cruzi</i> -negative_4  | 0.28             | 0.20     |
| <i>T. cruzi</i> -negative_5  | 0.26             | 0.25     |
| <i>T. cruzi</i> -negative_6  | 0.38             | 0.34     |
| <i>T. cruzi</i> -negative_7  | 0.37             | 0.33     |
| <i>T. cruzi</i> -negative_8  | 0.50             | 0.38     |
| <i>T. cruzi</i> -negative_9  | 0.29             | 0.26     |
| <i>T. cruzi</i> -negative_10 | 0.49             | 0.50     |
| <i>T. cruzi</i> -negative_11 | 0.47             | 0.40     |
| <i>T. cruzi</i> -negative_12 | 0.50             | 0.47     |
| <i>T. cruzi</i> -negative_13 | 0.16             | 0.23     |
| <i>T. cruzi</i> -negative_14 | 0.14             | 0.16     |
| <i>T. cruzi</i> -negative_15 | 0.43             | 0.33     |
| <i>T. cruzi</i> -negative_16 | 0.27             | 0.24     |
| <i>T. cruzi</i> -negative_17 | 0.57             | 0.43     |
| <i>T. cruzi</i> -negative_18 | 0.46             | 0.38     |
| <i>T. cruzi</i> -negative_19 | 0.92             | 0.74     |
| <i>T. cruzi</i> -negative_20 | 0.80             | 0.52     |
| <i>T. cruzi</i> -negative_21 | 0.89             | 0.64     |
| <i>T. cruzi</i> -negative_22 | 0.86             | 0.70     |
| <i>T. cruzi</i> -negative_23 | 0.78             | 0.68     |
| <i>T. cruzi</i> -negative_24 | 0.60             | 0.43     |
| <i>T. cruzi</i> -negative_25 | 0.68             | 0.59     |
| <i>T. cruzi</i> -negative_26 | 0.79             | 0.53     |
| <i>T. cruzi</i> -negative_27 | 0.96             | 0.80     |
| <i>T. cruzi</i> -negative_28 | 0.60             | 0.43     |
| <i>T. cruzi</i> -negative_29 | 0.75             | 0.57     |
| <i>T. cruzi</i> -negative_30 | 0.69             | 0.52     |
| <i>T. cruzi</i> -negative_31 | 0.66             | 0.48     |
| <i>T. cruzi</i> -negative_32 | 0.96             | 0.73     |
| <i>T. cruzi</i> -negative_33 | 0.41             | 0.50     |
| <i>T. cruzi</i> -negative_34 | 0.89             | 0.63     |
| <i>T. cruzi</i> -negative_35 | 0.72             | 0.53     |
| <i>T. cruzi</i> -negative_36 | 0.71             | 0.49     |
| <i>T. cruzi</i> -negative_37 | 0.93             | 0.73     |
| <i>T. cruzi</i> -negative_38 | 0.71             | 0.54     |
| <i>T. cruzi</i> -negative_39 | 0.57             | 0.53     |
| <i>T. cruzi</i> -negative_40 | 0.54             | 0.44     |
| <i>T. cruzi</i> -negative_41 | 0.86             | 0.59     |
| <i>T. cruzi</i> -negative_42 | 0.72             | 0.52     |
| <i>T. cruzi</i> -negative_43 | 0.56             | 0.45     |
| <i>T. cruzi</i> -negative_44 | 0.82             | 0.62     |
| <i>T. cruzi</i> -negative_45 | 0.52             | 0.45     |
| <i>T. cruzi</i> -negative_46 | 0.63             | 0.54     |

| Samples                      | Reactivity Index |          |
|------------------------------|------------------|----------|
|                              | IBMP-8.1         | IBMP-8.4 |
| <i>T. cruzi</i> -negative_47 | 0.62             | 0.43     |
| <i>T. cruzi</i> -negative_48 | 0.14             | 0.21     |
| <i>T. cruzi</i> -negative_49 | 0.53             | 0.48     |
| <i>T. cruzi</i> -negative_50 | 0.40             | 0.49     |
| <i>T. cruzi</i> -negative_51 | 0.79             | 0.61     |
| <i>T. cruzi</i> -negative_52 | 0.46             | 0.50     |
| <i>T. cruzi</i> -negative_53 | 0.19             | 0.25     |
| <i>T. cruzi</i> -negative_54 | 0.24             | 0.28     |
| <i>T. cruzi</i> -negative_55 | 0.59             | 0.55     |
| <i>T. cruzi</i> -negative_56 | 0.40             | 0.32     |
| <i>T. cruzi</i> -negative_57 | 0.34             | 0.28     |
| <i>T. cruzi</i> -negative_58 | 0.37             | 0.34     |
| <i>T. cruzi</i> -negative_59 | 0.44             | 0.76     |
| <i>T. cruzi</i> -negative_60 | 0.27             | 0.29     |
| <i>T. cruzi</i> -negative_61 | 0.23             | 0.23     |
| <i>T. cruzi</i> -negative_62 | 0.18             | 0.25     |
| <i>T. cruzi</i> -negative_63 | 0.28             | 0.29     |
| <i>T. cruzi</i> -negative_64 | 0.18             | 0.21     |
| <i>T. cruzi</i> -negative_65 | 0.32             | 0.48     |
| <i>T. cruzi</i> -negative_66 | 0.41             | 0.43     |
| <i>T. cruzi</i> -negative_67 | 0.54             | 0.55     |
| <i>T. cruzi</i> -negative_68 | 0.32             | 0.31     |
| <i>T. cruzi</i> -negative_69 | 0.42             | 0.47     |
| <i>T. cruzi</i> -negative_70 | 0.27             | 0.36     |
| <i>T. cruzi</i> -negative_71 | 0.78             | 0.90     |
| <i>T. cruzi</i> -negative_72 | 0.22             | 0.27     |
| <i>T. cruzi</i> -negative_73 | 0.18             | 0.38     |
| <i>T. cruzi</i> -negative_74 | 0.38             | 0.43     |
| <i>T. cruzi</i> -negative_75 | 0.29             | 0.29     |
| <i>T. cruzi</i> -negative_76 | 0.30             | 0.32     |
| <i>T. cruzi</i> -negative_77 | 0.47             | 0.43     |
| <i>T. cruzi</i> -negative_78 | 0.41             | 0.46     |
| <i>T. cruzi</i> -negative_79 | 0.14             | 0.29     |
| <i>T. cruzi</i> -negative_80 | 0.51             | 0.52     |
| <i>T. cruzi</i> -negative_81 | 0.44             | 0.34     |
| <i>T. cruzi</i> -negative_82 | 0.24             | 0.18     |
| <i>T. cruzi</i> -negative_83 | 0.37             | 0.29     |
| <i>T. cruzi</i> -negative_84 | 0.40             | 0.30     |
| <i>T. cruzi</i> -negative_85 | 0.21             | 0.15     |
| <i>T. cruzi</i> -negative_86 | 0.51             | 0.27     |
| <i>T. cruzi</i> -negative_87 | 0.38             | 0.26     |
| <i>T. cruzi</i> -negative_88 | 0.60             | 0.42     |
| <i>T. cruzi</i> -negative_89 | 0.44             | 0.27     |
| <i>T. cruzi</i> -negative_90 | 0.36             | 0.23     |
| <i>T. cruzi</i> -negative_91 | 0.58             | 0.43     |
| <i>T. cruzi</i> -negative_92 | 0.31             | 0.19     |

| Samples                       | Reactivity Index |          |
|-------------------------------|------------------|----------|
|                               | IBMP-8.1         | IBMP-8.4 |
| <i>T. cruzi</i> -negative_93  | 0.39             | 0.25     |
| <i>T. cruzi</i> -negative_94  | 0.26             | 0.23     |
| <i>T. cruzi</i> -negative_95  | 0.29             | 0.19     |
| <i>T. cruzi</i> -negative_96  | 0.52             | 0.38     |
| <i>T. cruzi</i> -negative_97  | 0.84             | 0.49     |
| <i>T. cruzi</i> -negative_98  | 0.25             | 0.19     |
| <i>T. cruzi</i> -negative_99  | 0.49             | 0.37     |
| <i>T. cruzi</i> -negative_100 | 0.18             | 0.15     |
| <i>T. cruzi</i> -negative_101 | 0.53             | 0.36     |
| <i>T. cruzi</i> -negative_102 | 0.17             | 0.07     |
| <i>T. cruzi</i> -negative_103 | 0.57             | 0.38     |
| <i>T. cruzi</i> -negative_104 | 0.41             | 0.23     |
| <i>T. cruzi</i> -negative_105 | 0.27             | 0.15     |
| <i>T. cruzi</i> -negative_106 | 0.38             | 0.29     |
| <i>T. cruzi</i> -negative_107 | 0.38             | 0.22     |
| <i>T. cruzi</i> -negative_108 | 0.34             | 0.19     |
| <i>T. cruzi</i> -negative_109 | 0.29             | 0.17     |
| <i>T. cruzi</i> -negative_110 | 0.53             | 0.29     |
| <i>T. cruzi</i> -negative_111 | 0.51             | 0.29     |
| <i>T. cruzi</i> -negative_112 | 0.32             | 0.18     |
| <i>T. cruzi</i> -negative_113 | 0.37             | 0.21     |
| <i>T. cruzi</i> -negative_114 | 0.30             | 0.16     |
| <i>T. cruzi</i> -negative_115 | 0.22             | 0.11     |
| <i>T. cruzi</i> -negative_116 | 0.38             | 0.25     |
| <i>T. cruzi</i> -negative_117 | 0.19             | 0.11     |
| <i>T. cruzi</i> -negative_118 | 0.36             | 0.23     |
| <i>T. cruzi</i> -negative_119 | 0.35             | 0.38     |
| <i>T. cruzi</i> -negative_120 | 0.47             | 0.58     |
| <i>T. cruzi</i> -negative_121 | 0.27             | 0.22     |
| <i>T. cruzi</i> -negative_122 | 0.41             | 0.32     |
| <i>T. cruzi</i> -positive_1   | 1.14             | 1.04     |
| <i>T. cruzi</i> -positive_2   | 2.50             | 1.61     |
| <i>T. cruzi</i> -positive_3   | 2.65             | 1.79     |
| <i>T. cruzi</i> -positive_4   | 1.67             | 1.53     |
| <i>T. cruzi</i> -positive_5   | 1.62             | 1.75     |
| <i>T. cruzi</i> -positive_6   | 1.80             | 1.84     |
| <i>T. cruzi</i> -positive_7   | 1.58             | 1.37     |
| <i>T. cruzi</i> -positive_8   | 2.33             | 2.22     |
| <i>T. cruzi</i> -positive_9   | 1.05             | 1.14     |
| <i>T. cruzi</i> -positive_10  | 1.17             | 1.14     |
| <i>T. cruzi</i> -positive_11  | 1.33             | 1.06     |
| <i>T. cruzi</i> -positive_12  | 1.75             | 1.80     |
| <i>T. cruzi</i> -positive_13  | 1.57             | 1.67     |
| <i>T. cruzi</i> -positive_14  | 1.82             | 1.77     |
| <i>T. cruzi</i> -positive_15  | 1.66             | 1.97     |
| <i>T. cruzi</i> -positive_16  | 2.49             | 2.47     |

| Samples                      | Reactivity Index |          |
|------------------------------|------------------|----------|
|                              | IBMP-8.1         | IBMP-8.4 |
| <i>T. cruzi</i> -positive_17 | 1.85             | 2.06     |
| <i>T. cruzi</i> -positive_18 | 1.46             | 1.81     |
| <i>T. cruzi</i> -positive_19 | 1.11             | 1.32     |
| <i>T. cruzi</i> -positive_20 | 1.40             | 1.62     |
| <i>T. cruzi</i> -positive_21 | 1.15             | 1.22     |
| <i>T. cruzi</i> -positive_22 | 1.84             | 1.90     |
| <i>T. cruzi</i> -positive_23 | 0.98             | 1.11     |
| <i>T. cruzi</i> -positive_24 | 1.80             | 1.87     |
| <i>T. cruzi</i> -positive_25 | 2.03             | 1.88     |
| <i>T. cruzi</i> -positive_26 | 2.01             | 2.15     |
| <i>T. cruzi</i> -positive_27 | 1.98             | 2.01     |
| <i>T. cruzi</i> -positive_28 | 1.04             | 1.44     |
| <i>T. cruzi</i> -positive_29 | 1.51             | 1.64     |
| <i>T. cruzi</i> -positive_30 | 0.94             | 1.14     |
| <i>T. cruzi</i> -positive_31 | 2.15             | 2.00     |
| <i>T. cruzi</i> -positive_32 | 1.02             | 1.19     |
| <i>T. cruzi</i> -positive_33 | 1.46             | 1.45     |
| <i>T. cruzi</i> -positive_34 | 2.32             | 2.12     |
| <i>T. cruzi</i> -positive_35 | 2.53             | 2.28     |
| <i>T. cruzi</i> -positive_36 | 1.53             | 1.38     |
| <i>T. cruzi</i> -positive_37 | 2.19             | 2.39     |
| <i>T. cruzi</i> -positive_38 | 2.44             | 2.26     |
| <i>T. cruzi</i> -positive_39 | 1.31             | 1.90     |
| <i>T. cruzi</i> -positive_40 | 1.34             | 1.70     |
| <i>T. cruzi</i> -positive_41 | 1.28             | 1.49     |
| <i>T. cruzi</i> -positive_42 | 1.71             | 1.85     |
| <i>T. cruzi</i> -positive_43 | 1.67             | 1.83     |
| <i>T. cruzi</i> -positive_44 | 1.79             | 2.12     |
| <i>T. cruzi</i> -positive_45 | 2.19             | 2.17     |
| <i>T. cruzi</i> -positive_46 | 1.40             | 1.89     |
| <i>T. cruzi</i> -positive_47 | 1.86             | 2.07     |
| <i>T. cruzi</i> -positive_48 | 0.83             | 1.13     |
| <i>T. cruzi</i> -positive_49 | 1.19             | 1.49     |
| <i>T. cruzi</i> -positive_50 | 2.09             | 2.18     |
| <i>T. cruzi</i> -positive_51 | 2.48             | 2.63     |
| <i>T. cruzi</i> -positive_52 | 2.42             | 2.22     |
| <i>T. cruzi</i> -positive_53 | 1.85             | 1.94     |
| <i>T. cruzi</i> -positive_54 | 1.21             | 1.50     |
| <i>T. cruzi</i> -positive_55 | 1.11             | 1.32     |
| <i>T. cruzi</i> -positive_56 | 2.01             | 2.67     |
| <i>T. cruzi</i> -positive_57 | 1.69             | 2.13     |
| <i>T. cruzi</i> -positive_58 | 0.91             | 1.17     |
| <i>T. cruzi</i> -positive_59 | 1.31             | 1.72     |
| <i>T. cruzi</i> -positive_60 | 1.33             | 2.53     |
| <i>T. cruzi</i> -positive_61 | 1.88             | 2.25     |
| <i>T. cruzi</i> -positive_62 | 1.67             | 2.19     |

| Samples                       | Reactivity Index |          |
|-------------------------------|------------------|----------|
|                               | IBMP-8.1         | IBMP-8.4 |
| <i>T. cruzi</i> -positive_63  | 0.69             | 1.27     |
| <i>T. cruzi</i> -positive_64  | 1.25             | 2.02     |
| <i>T. cruzi</i> -positive_65  | 1.76             | 2.19     |
| <i>T. cruzi</i> -positive_66  | 1.19             | 1.59     |
| <i>T. cruzi</i> -positive_67  | 1.79             | 2.06     |
| <i>T. cruzi</i> -positive_68  | 1.43             | 1.89     |
| <i>T. cruzi</i> -positive_69  | 1.76             | 2.38     |
| <i>T. cruzi</i> -positive_70  | 1.32             | 1.88     |
| <i>T. cruzi</i> -positive_71  | 1.60             | 2.24     |
| <i>T. cruzi</i> -positive_72  | 1.12             | 1.86     |
| <i>T. cruzi</i> -positive_73  | 2.05             | 2.52     |
| <i>T. cruzi</i> -positive_74  | 1.61             | 2.24     |
| <i>T. cruzi</i> -positive_75  | 1.22             | 1.94     |
| <i>T. cruzi</i> -positive_76  | 1.09             | 1.84     |
| <i>T. cruzi</i> -positive_77  | 1.21             | 1.69     |
| <i>T. cruzi</i> -positive_78  | 1.68             | 2.07     |
| <i>T. cruzi</i> -positive_79  | 1.69             | 2.19     |
| <i>T. cruzi</i> -positive_80  | 1.75             | 2.35     |
| <i>T. cruzi</i> -positive_81  | 1.54             | 1.84     |
| <i>T. cruzi</i> -positive_82  | 1.92             | 2.47     |
| <i>T. cruzi</i> -positive_83  | 1.02             | 1.69     |
| <i>T. cruzi</i> -positive_84  | 1.80             | 2.12     |
| <i>T. cruzi</i> -positive_85  | 1.66             | 2.39     |
| <i>T. cruzi</i> -positive_86  | 1.02             | 2.02     |
| <i>T. cruzi</i> -positive_87  | 1.93             | 2.51     |
| <i>T. cruzi</i> -positive_88  | 0.87             | 1.19     |
| <i>T. cruzi</i> -positive_89  | 1.88             | 2.16     |
| <i>T. cruzi</i> -positive_90  | 2.12             | 2.78     |
| <i>T. cruzi</i> -positive_91  | 1.92             | 2.32     |
| <i>T. cruzi</i> -positive_92  | 1.10             | 1.21     |
| <i>T. cruzi</i> -positive_93  | 2.06             | 2.09     |
| <i>T. cruzi</i> -positive_94  | 1.83             | 1.93     |
| <i>T. cruzi</i> -positive_95  | 1.33             | 1.48     |
| <i>T. cruzi</i> -positive_96  | 1.80             | 2.35     |
| <i>T. cruzi</i> -positive_97  | 1.66             | 2.60     |
| <i>T. cruzi</i> -positive_98  | 1.04             | 1.83     |
| <i>T. cruzi</i> -positive_99  | 1.73             | 2.18     |
| <i>T. cruzi</i> -positive_100 | 1.80             | 2.59     |
| <i>T. cruzi</i> -positive_101 | 1.76             | 2.41     |
| <i>T. cruzi</i> -positive_102 | 1.66             | 2.05     |
| <i>T. cruzi</i> -positive_103 | 2.05             | 2.49     |
| <i>T. cruzi</i> -positive_104 | 1.43             | 2.09     |
| <i>T. cruzi</i> -positive_105 | 2.04             | 2.84     |
| <i>T. cruzi</i> -positive_106 | 1.91             | 2.33     |
| <i>T. cruzi</i> -positive_107 | 1.21             | 1.91     |
| <i>T. cruzi</i> -positive_108 | 1.27             | 1.89     |

| Samples                       | Reactivity Index |          |
|-------------------------------|------------------|----------|
|                               | IBMP-8.1         | IBMP-8.4 |
| <i>T. cruzi</i> -positive_109 | 1.16             | 1.63     |
| <i>T. cruzi</i> -positive_110 | 1.33             | 1.97     |
| <i>T. cruzi</i> -positive_111 | 1.39             | 2.37     |
| <i>T. cruzi</i> -positive_112 | 1.70             | 2.18     |
| <i>T. cruzi</i> -positive_113 | 2.02             | 2.63     |
| <i>T. cruzi</i> -positive_114 | 1.61             | 2.10     |
| <i>T. cruzi</i> -positive_115 | 1.15             | 1.75     |
| <i>T. cruzi</i> -positive_116 | 1.50             | 2.57     |
| <i>T. cruzi</i> -positive_117 | 1.76             | 2.65     |
| <i>T. cruzi</i> -positive_118 | 1.84             | 1.91     |
| <i>T. cruzi</i> -positive_119 | 1.73             | 1.82     |
| <i>T. cruzi</i> -positive_120 | 1.84             | 2.03     |
| <i>T. cruzi</i> -positive_121 | 1.31             | 1.57     |
| <i>T. cruzi</i> -positive_122 | 1.31             | 1.57     |
| <i>T. cruzi</i> -positive_123 | 2.15             | 2.30     |
| <i>T. cruzi</i> -positive_124 | 1.75             | 2.25     |
| <i>T. cruzi</i> -positive_125 | 0.80             | 1.16     |
| <i>T. cruzi</i> -positive_126 | 1.64             | 1.86     |
| <i>T. cruzi</i> -positive_127 | 2.43             | 2.42     |
| <i>T. cruzi</i> -positive_128 | 1.29             | 1.57     |
| <i>T. cruzi</i> -positive_129 | 1.13             | 1.63     |
| <i>T. cruzi</i> -positive_130 | 1.54             | 1.97     |
| <i>T. cruzi</i> -positive_131 | 1.17             | 1.11     |
| <i>T. cruzi</i> -positive_132 | 1.99             | 1.91     |
| <i>T. cruzi</i> -positive_133 | 2.08             | 2.05     |
| <i>T. cruzi</i> -positive_134 | 2.27             | 2.40     |
| <i>T. cruzi</i> -positive_135 | 2.24             | 2.13     |
| <i>T. cruzi</i> -positive_136 | 2.07             | 1.82     |
| <i>T. cruzi</i> -positive_137 | 2.29             | 2.20     |
| <i>T. cruzi</i> -positive_138 | 1.76             | 1.61     |
| <i>T. cruzi</i> -positive_139 | 1.63             | 1.73     |
| <i>T. cruzi</i> -positive_140 | 1.02             | 1.08     |
| <i>T. cruzi</i> -positive_141 | 2.37             | 2.20     |
| <i>T. cruzi</i> -positive_142 | 1.59             | 1.46     |
| <i>T. cruzi</i> -positive_143 | 2.21             | 1.93     |
| <i>T. cruzi</i> -positive_144 | 1.09             | 1.15     |
| <i>T. cruzi</i> -positive_145 | 2.62             | 2.26     |
| <i>T. cruzi</i> -positive_146 | 2.46             | 2.26     |
| <i>T. cruzi</i> -positive_147 | 2.73             | 2.28     |
| <i>T. cruzi</i> -positive_148 | 2.64             | 2.42     |
| <i>T. cruzi</i> -positive_149 | 1.44             | 1.75     |
| <i>T. cruzi</i> -positive_150 | 1.81             | 1.64     |
| <i>T. cruzi</i> -positive_151 | 0.85             | 1.10     |
| <i>T. cruzi</i> -positive_152 | 2.35             | 2.24     |
| <i>T. cruzi</i> -positive_153 | 2.24             | 2.26     |
| <i>T. cruzi</i> -positive_154 | 1.65             | 2.36     |

| Samples                       | Reactivity Index |          |
|-------------------------------|------------------|----------|
|                               | IBMP-8.1         | IBMP-8.4 |
| <i>T. cruzi</i> -positive_155 | 2.39             | 2.07     |
| <i>T. cruzi</i> -positive_156 | 1.97             | 2.23     |
| <i>T. cruzi</i> -positive_157 | 2.14             | 2.19     |
| <i>T. cruzi</i> -positive_158 | 2.17             | 2.23     |
| <i>T. cruzi</i> -positive_159 | 2.21             | 2.07     |
| <i>T. cruzi</i> -positive_160 | 2.51             | 2.50     |
| <i>T. cruzi</i> -positive_161 | 1.45             | 1.81     |
| <i>T. cruzi</i> -positive_162 | 2.45             | 2.72     |
| <i>T. cruzi</i> -positive_163 | 1.56             | 1.54     |
| <i>T. cruzi</i> -positive_164 | 1.85             | 2.00     |
| <i>T. cruzi</i> -positive_165 | 2.19             | 2.23     |
| <i>T. cruzi</i> -positive_166 | 2.30             | 2.18     |
| <i>T. cruzi</i> -positive_167 | 1.55             | 1.95     |
| <i>T. cruzi</i> -positive_168 | 2.00             | 2.10     |
| <i>T. cruzi</i> -positive_169 | 1.01             | 1.45     |
| <i>T. cruzi</i> -positive_170 | 1.35             | 1.48     |
| <i>T. cruzi</i> -positive_171 | 2.14             | 2.28     |
| <i>T. cruzi</i> -positive_172 | 2.14             | 1.81     |
| <i>T. cruzi</i> -positive_173 | 1.56             | 1.46     |
| <i>T. cruzi</i> -positive_174 | 1.43             | 1.50     |
| <i>T. cruzi</i> -positive_175 | 2.14             | 1.80     |
| <i>T. cruzi</i> -positive_176 | 1.61             | 1.85     |
| <i>T. cruzi</i> -positive_177 | 2.24             | 1.91     |
| <i>T. cruzi</i> -positive_178 | 1.18             | 1.38     |
| <i>T. cruzi</i> -positive_179 | 2.20             | 2.32     |
| <i>T. cruzi</i> -positive_180 | 2.07             | 1.71     |
| <i>T. cruzi</i> -positive_181 | 2.37             | 2.07     |
| <i>T. cruzi</i> -positive_182 | 1.64             | 1.61     |
| <i>T. cruzi</i> -positive_183 | 1.72             | 1.99     |
| <i>T. cruzi</i> -positive_184 | 2.07             | 2.12     |
| <i>T. cruzi</i> -positive_185 | 0.94             | 1.08     |
| <i>T. cruzi</i> -positive_186 | 2.07             | 2.19     |
| <i>T. cruzi</i> -positive_187 | 1.40             | 1.76     |
| <i>T. cruzi</i> -positive_188 | 2.81             | 1.89     |
| <i>T. cruzi</i> -positive_189 | 2.13             | 1.81     |
| <i>T. cruzi</i> -positive_190 | 1.26             | 1.32     |
| <i>T. cruzi</i> -positive_191 | 1.56             | 1.78     |
| <i>T. cruzi</i> -positive_192 | 2.33             | 2.18     |
| <i>T. cruzi</i> -positive_193 | 1.92             | 1.92     |
| <i>T. cruzi</i> -positive_194 | 1.12             | 1.26     |
| <i>T. cruzi</i> -positive_195 | 1.53             | 1.53     |
| <i>T. cruzi</i> -positive_196 | 1.50             | 1.41     |
| <i>T. cruzi</i> -positive_197 | 1.02             | 1.13     |
| <i>T. cruzi</i> -positive_198 | 2.01             | 2.05     |
| <i>T. cruzi</i> -positive_199 | 1.27             | 1.33     |
| <i>T. cruzi</i> -positive_200 | 1.11             | 1.14     |

| Samples                       | Reactivity Index |          |
|-------------------------------|------------------|----------|
|                               | IBMP-8.1         | IBMP-8.4 |
| <i>T. cruzi</i> -positive_201 | 1.84             | 1.69     |
| <i>T. cruzi</i> -positive_202 | 2.50             | 2.27     |
| <i>T. cruzi</i> -positive_203 | 1.71             | 1.84     |
| <i>T. cruzi</i> -positive_204 | 1.51             | 1.60     |
| <i>T. cruzi</i> -positive_205 | 1.65             | 1.78     |
| <i>T. cruzi</i> -positive_206 | 1.92             | 1.90     |
| <i>T. cruzi</i> -positive_207 | 1.86             | 2.14     |
| <i>T. cruzi</i> -positive_208 | 2.64             | 2.15     |
| <i>T. cruzi</i> -positive_209 | 2.52             | 2.03     |
| <i>T. cruzi</i> -positive_210 | 1.85             | 1.95     |
| <i>T. cruzi</i> -positive_211 | 1.46             | 1.83     |
| <i>T. cruzi</i> -positive_212 | 1.53             | 1.46     |
| <i>T. cruzi</i> -positive_213 | 1.30             | 1.27     |
| <i>T. cruzi</i> -positive_214 | 1.33             | 1.71     |
| <i>T. cruzi</i> -positive_215 | 0.97             | 1.05     |
